# Supplementary material for: What do we know about how the terrestrial multicellular soil fauna reacts to microplastic?
Source: Copernicus journal article supplement (doi:10.5194/soil-6-245-2020), 2020-07-08
Supplement: Supplementary file 1 [file soil-6-245-2020-supplement.zip]

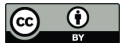

## *Supplement of*

# **What do we know about how the terrestrial multicellular soil fauna reacts to microplastic?**

**Frederick Büks et al.**

*Correspondence to:* Frederick Büks ([frederick.bueks@tu-berlin.de](mailto:frederick.bueks@tu-berlin.de))

- [soil-6-245-2020-supplement-title-page.pdf](#)
- [Supplements.ods](#)

The copyright of individual parts of the supplement might differ from the CC BY 4.0 License.
